# Supplementary material for: Environment effects upon electrodeposition of thin film copper oxide nanomaterials
Source: Royal Society of Chemistry journal article supplement (doi:10.1039/d2tc04662h), 2023-01-01
Supplement: d2tc04662h1.pdf [file d2tc04662h1.pdf]

Supporting information for:

Environment effects upon electrodeposition of thin film  
copper oxide nanomaterials

Mark A. Buckingham,<sup>a,\*</sup> Weichen Xiao,<sup>a</sup> Brendan Ward-O'Brien,<sup>a</sup> Kathryn Yearsley,<sup>b</sup> Usama  
Zulfiqar,<sup>a</sup> Ben Spencer,<sup>a</sup> Allan Matthews<sup>a,\*</sup> and David J. Lewis<sup>a,\*</sup>

<sup>a</sup> Department of Materials, The University of Manchester, Sackville Street, M13 9PL.

<sup>b</sup> Applied Sciences, bp Innovation and Engineering, BP plc, Saltend, Hull, HU12 8DS, UK.

\* Corresponding authors: [mark.buckingham@manchester.ac.uk](mailto:mark.buckingham@manchester.ac.uk),  
[allan.matthews@manchester.ac.uk](mailto:allan.matthews@manchester.ac.uk) and [david.lewis-4@manchester.ac.uk](mailto:david.lewis-4@manchester.ac.uk)

## Contents

**Table S1.** Pt wire vs Cu wire counter electrode on deposition

**Table S2.** Table of data from EIS analysis

**Figure S1.** EIS fitting of Nyquist plots for Cl-only environments

**Figure S2.** Raw data of film deposition from the 5 mM CuCl<sub>2</sub> + 5 mM NaCl system

**Figure S3.** Raw data of film deposition from the 5 mM CuCl<sub>2</sub> + 50 mM NaCl system

**Figure S4.** pXRD patterns

**Figure S5.** Raman spectra of 5 mM CuCl<sub>2</sub> + 5 mM NaCl system

**Figure S6.** Cross-section SEM analysis

**Figure S7.** 100 cycle deposition analysis

**Figure S8.** SEM images of 5 mM CuCl<sub>2</sub> + 50 mM NaCl system depositions

**Figure S9.** Picture of increasing inter-electrode separation setup

**Figure S10.** Cyclic voltametric response of increasing inter-electrode separation

**Figure S11.** EIS Fitting of Nyquist plots for increasing inter-electrode separation

**Figure S12.** Analysis of inter-electrode separation on higher electrolyte concentration

**Figure S13.** EIS Fitting of Nyquist plots for mixed anion environments

**Figure S14.** Raman spectra of films deposited from mixed anion environments

**Figure S15.** XPS survey spectra films deposited from of Cu-only and mixed anion environments

**Figure S16.** XPS Cu 2p spectra of films deposited from Cu-only and mixed anion environments

**Figure S17.** XPS Auger spectra of films deposited from Cu-only and mixed anion environments

**Figure S18.** EIS Fitting of Nyquist plots for mono anion environments

**Figure S19.** Raman spectra of films deposited from mono anion environments

**Figure S20.** XPS survey spectra films deposited from of mono anion environments

**Figure S21.** XPS Cu 2p spectra of films deposited mono anion environments

**Figure S22.** XPS Auger spectra of films deposited from mono anion environments

**Figure S23.** UV-Vis spectra of all films deposited from all environments

**Figure S24.** Tauc plots of UV-Vis spectra for band gap analysis

**Table S3.** Table of data for Ionic Strength, pH, Conductivity,  $V_{OCP}$ ,  $R_s$ ,  $R_{ET}$ ,  $j_p$ , thin film resistance, thin film conductivity and thin film  $E_g$

**Table S4.** Table of data for quantitative nanocube analysis

## Pt vs Cu wire counter electrode on electrodeposition

The effect of using a Pt counter vs Cu counter was investigated on the 30 cycle  $t_{\text{O}} > t_{\text{R}}$  deposition in 5 mM  $\text{Cu}(\text{Cl})_2$ , 5 mM NaCl system. The quantitatively measured nanocube size and nanocube concentration is displayed below.

**Table S1.** Table of data showing the difference in nanocube size and nanocube concentration with choice of counter electrode.

| Counter electrode | Nanocube size / nm | Nanocube concentration ( $\times 10^8$ ) / $\text{cm}^{-2}$ |
|-------------------|--------------------|-------------------------------------------------------------|
| Cu                | $134 \pm 15$       | $3.1 \pm 0.2$                                               |
| Pt                | $188 \pm 18$       | $1.3 \pm 0.6$                                               |

## EIS analysis of altering electrolyte concentration

**Table S2.** Table of data for Electrochemical Impedance Spectroscopic analysis of 5 mM  $\text{Cu}(\text{Cl})_2$  in the presence of either 5 mM NaCl or 50 mM NaCl.

| Copper System (electrolyte)          | $R_s / \Omega$ | $R_{\text{ET}} / \Omega$ |
|--------------------------------------|----------------|--------------------------|
| $\text{CuCl}_2 + 5 \text{ mM NaCl}$  | $614 \pm 5$    | $790 \pm 13$             |
| $\text{CuCl}_2 + 50 \text{ mM NaCl}$ | $253 \pm 2$    | $580 \pm 9$              |

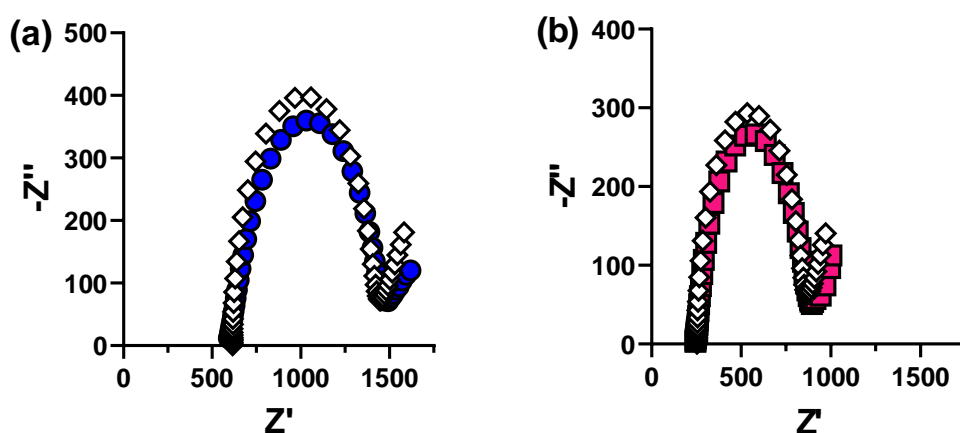

**Figure S1** – Electrochemical Impedance Spectra of 5 mM  $\text{CuCl}_2$  in the presence of (a) 5 mM and (b) 50 mM NaCl on ITO-coated glass substrate working electrode using a Cu wire counter and a  $\text{Ag}/\text{AgCl}$  (3 M NaCl) reference electrode.

## Deposition data for 5 mM $\text{CuCl}_2$ with either 5 mM or 50 mM NaCl

5 mM  $\text{CuCl}_2$  and 5 mM NaCl

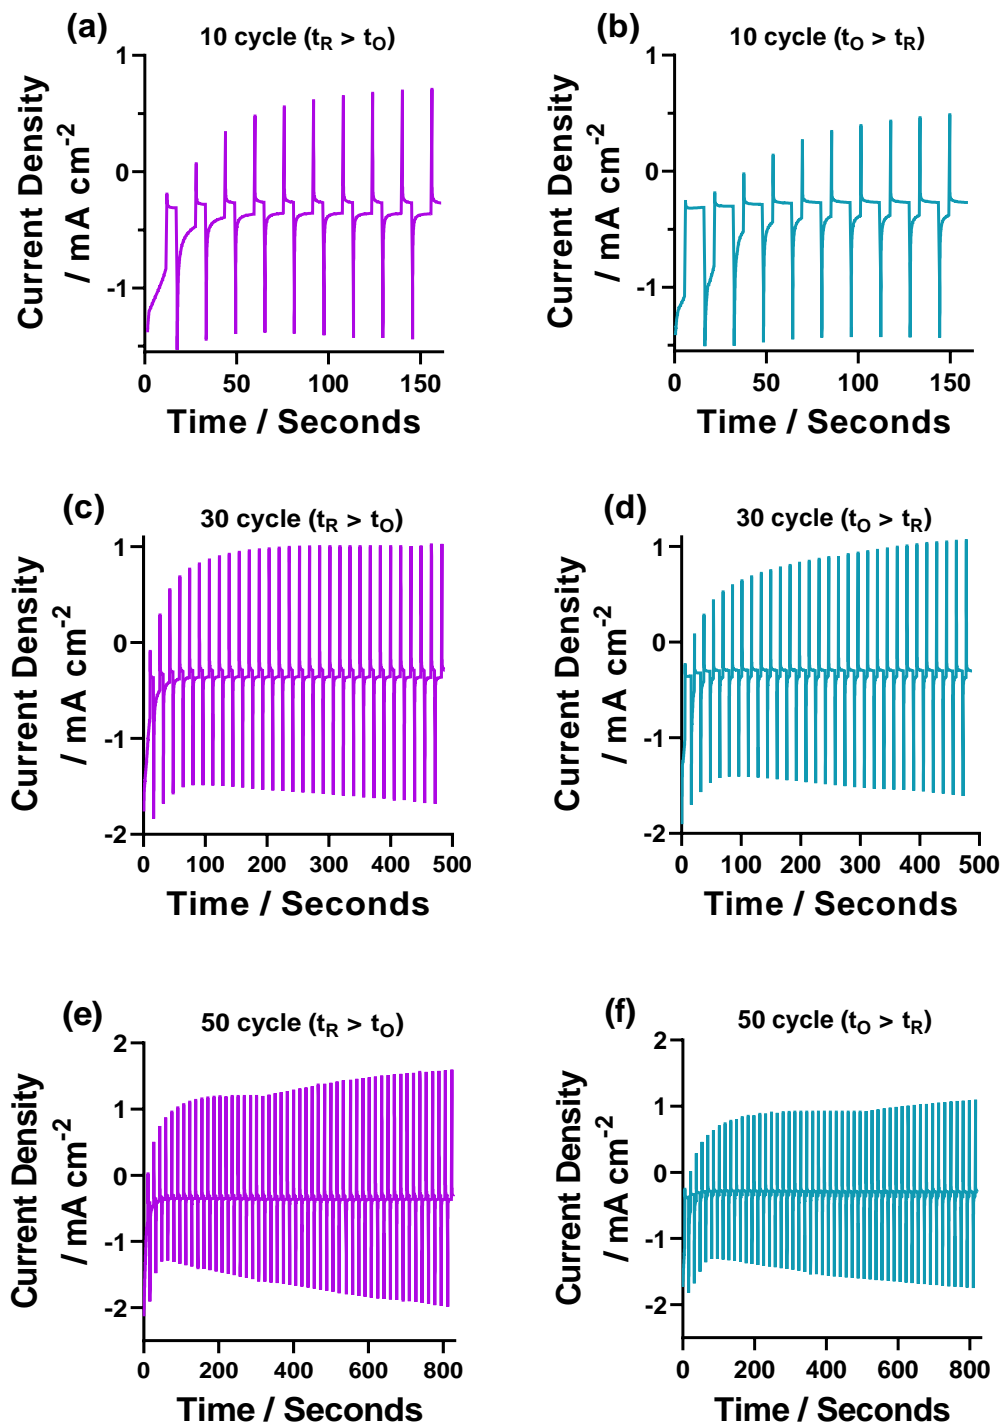

**Figure S2** – Electrochemical deposition of Cu thin film for the 5 mM  $\text{Cu}(\text{Cl})_2$  with 5 mM NaCl system. Deposition was performed using chronoamperometry with -0.8 V (reducing potential) and -0.15 V (oxidising potential) vs ag/AgCl, with a 10 s : 5 s ratio of deposition time, where  $t_R$

$t_0 > t_R$  corresponds to a  $t_R = 10$  s and  $t_0 = 5$  s and  $t_0 < t_R$  corresponds to  $t_R = 5$  s and  $t_0 = 10$  s for (a, b) 10 cycles, (c, d) 30 cycles and (e, f) 50 cycles for (a, c, e)  $t_R > t_0$  and (b, d, f)  $t_0 > t_R$ .

5 mM CuCl<sub>2</sub> and 50 mM NaCl

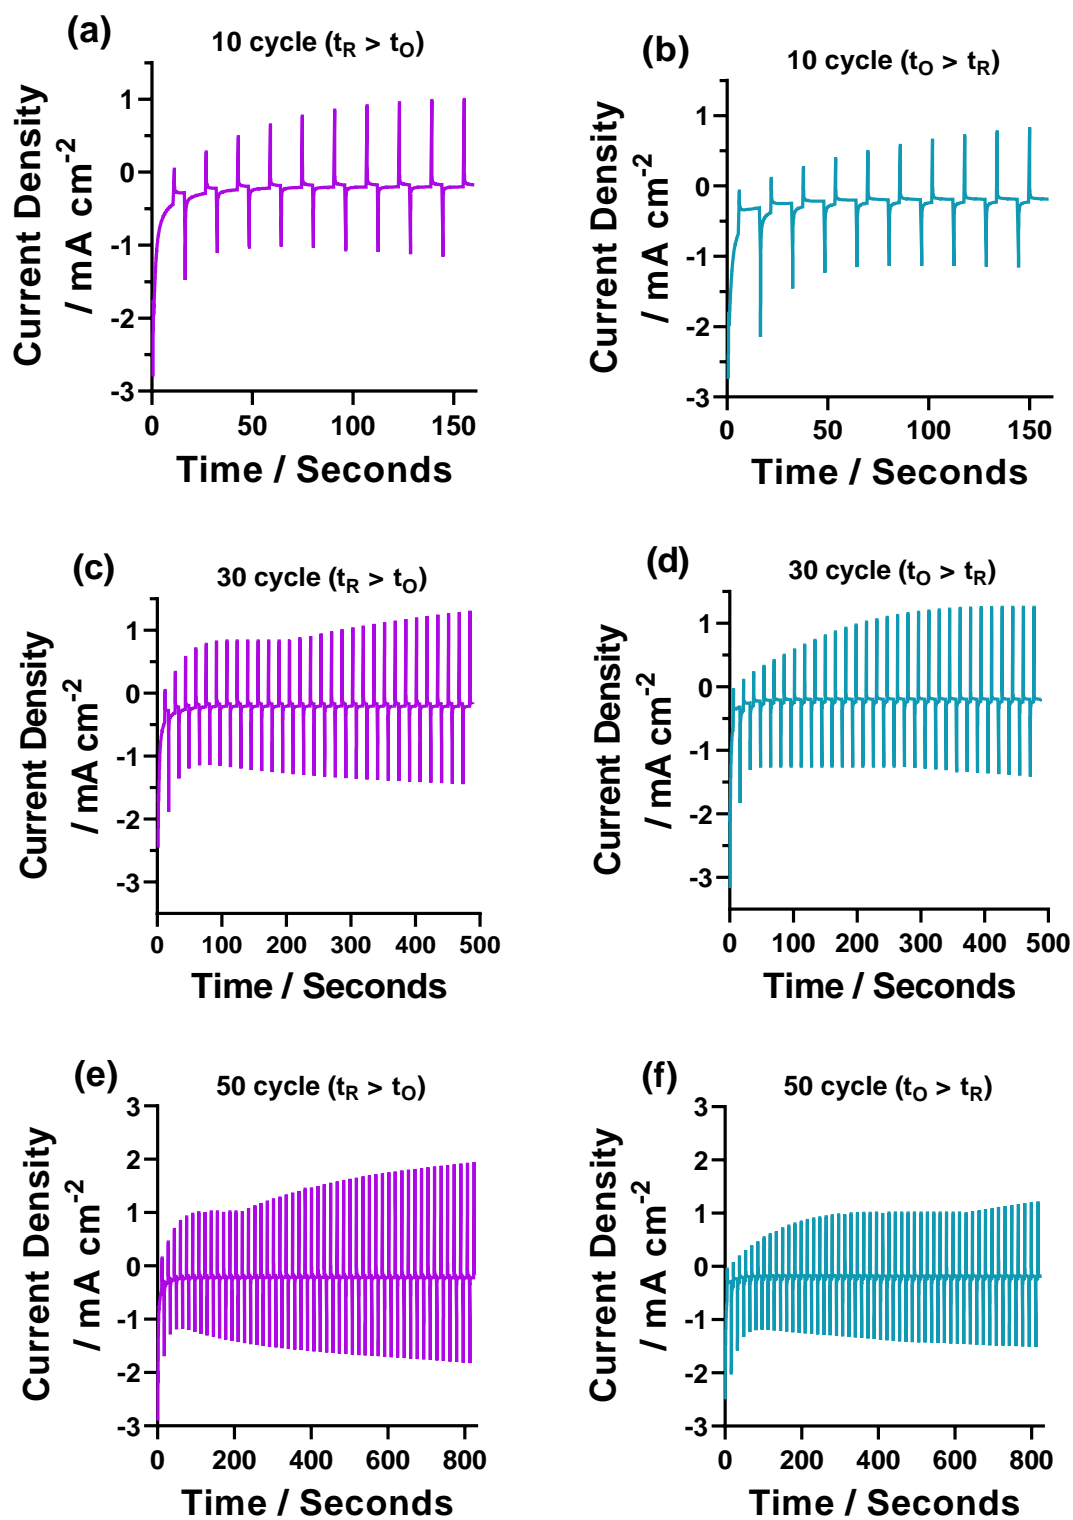

**Figure S3** - Electrochemical deposition of Cu thin film for the 5 mM Cu(Cl)<sub>2</sub> with 50 mM NaCl system. Deposition was performed using chronoamperometry with -0.8 V (reducing potential) and -0.15 V (oxidising potential) vs ag/AgCl, with a 10 s : 5 s ratio of deposition time, where  $t_R$

$t_R > t_O$  corresponds to a  $t_R = 10$  s and  $t_O = 5$  s and  $t_O > t_R$  corresponds to  $t_R = 5$  s and  $t_O = 10$  s for (a, b) 10 cycles, (c, d) 30 cycles and (e, f) 50 cycles for (a, c, e)  $t_R > t_O$  and (b, d, f)  $t_O > t_R$ .

## Analysis of thin film Cu-nanomaterial deposition

### pXRD

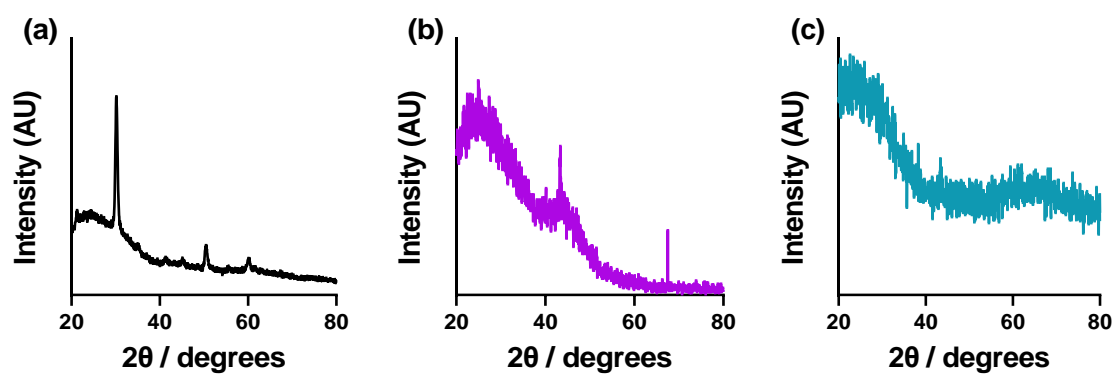

**Figure S4.** Figure showing the pXRD patterns for (a) bare ITO-coated glass electrodes and after electrodeposition of (b) 30 cycle  $t_R > t_O$  and (c) 30 cycle  $t_O > t_R$ .



## Raman Spectroscopy

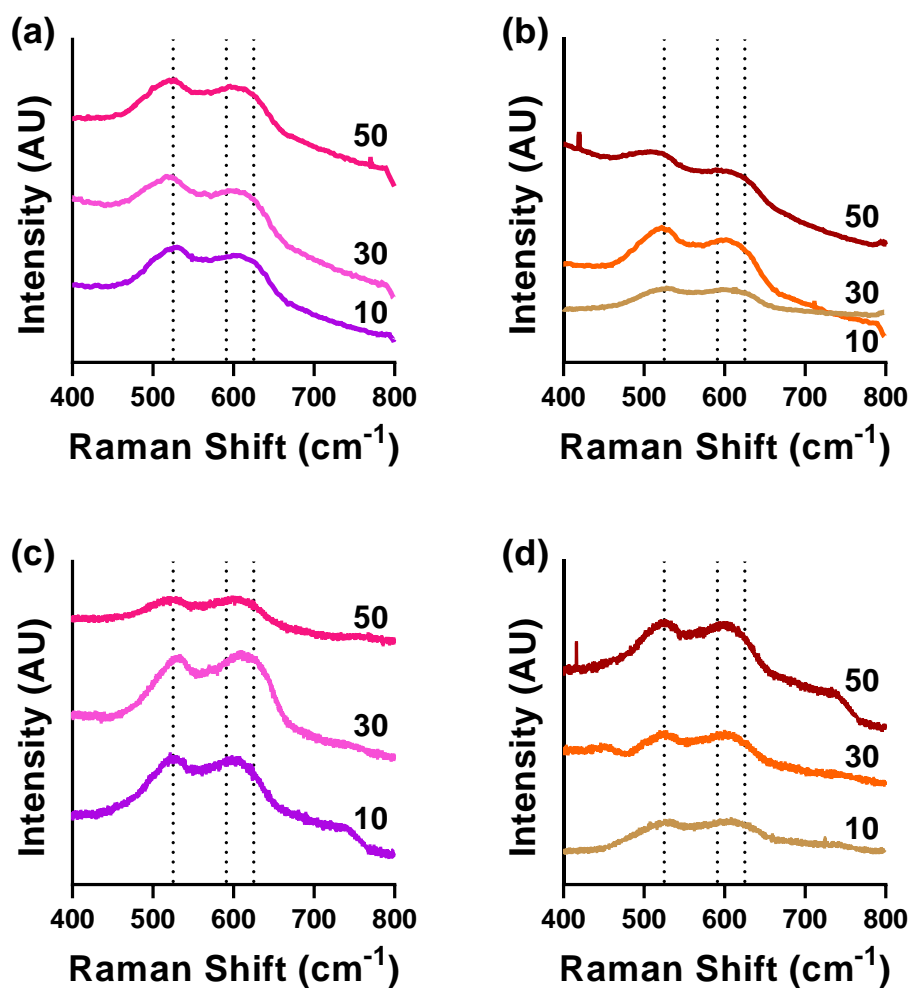

**Figure S5** – Raman spectra measured for 5 mM CuCl<sub>2</sub> with (a, b) 5 mM NaCl and (c, d) 50 mM NaCl where (a, c) are t<sub>R</sub> 10 s and t<sub>O</sub> 5 s and (b, d) t<sub>O</sub> 10 s and t<sub>R</sub> 5 s for either 10, 30 or 50 cycles as shown. Recorded using a 633 nm wavelength laser at 50 x magnification and 25 % power (note the y-axis has been manually offset and is not representative of recorded intensity). Ticked lines are 525 and 625 which have been previously reported for Cu<sub>2</sub>O.<sup>1</sup>

## Cross-section SEM

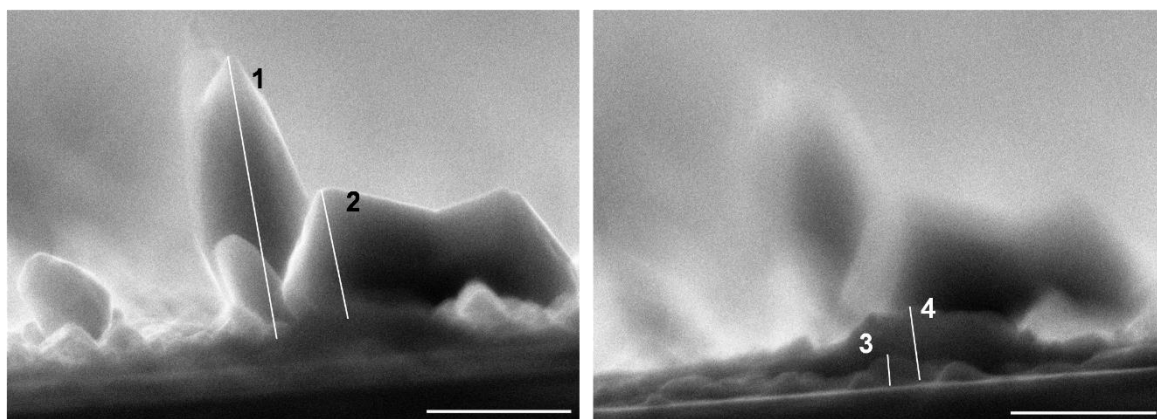

**Figure S6.** Cross section SEM images of the 30 cycle  $t_0 > t_R$  deposition in 5 mM  $\text{Cu}(\text{Cl})_2$ , 5 mM NaCl system. Where the scale bars are 1  $\mu\text{m}$  and the measured distances 1 = 1.98  $\mu\text{m}$ , 2 = 0.90  $\mu\text{m}$ , 3 = 218  $\mu\text{m}$  and 4 = 532  $\mu\text{m}$ .

## 100 cycle deposition

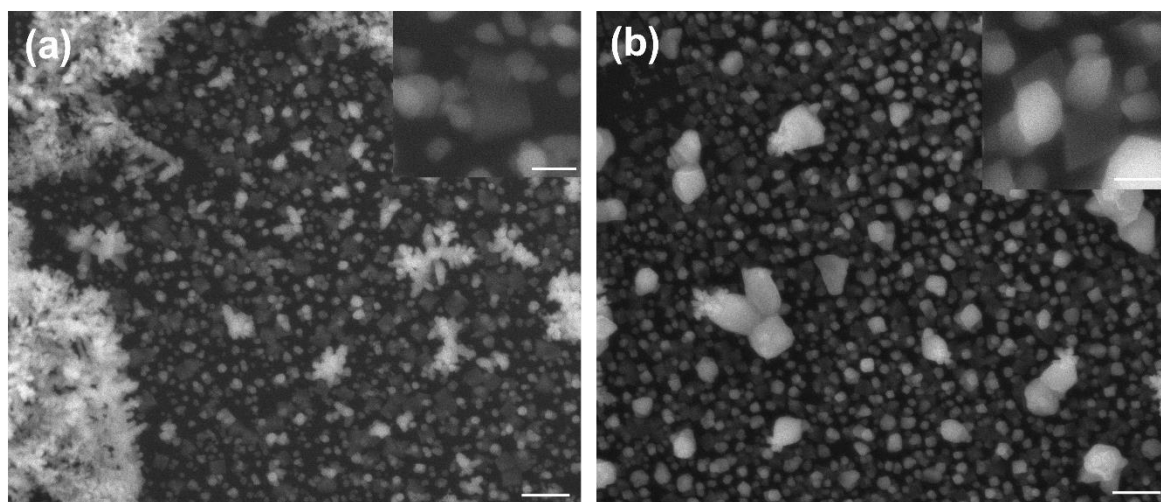

**Figure S7.** Figure showing representative secondary electron SEM images of electrodeposited copper electrodes from the 5 mM  $\text{CuCl}_2$  and 5 mM  $\text{NaCl}$  solution with 100 cycles of (a)  $t_R > t_O$  and (b)  $t_O > t_R$ . Scale bars for main images represent 1  $\mu\text{m}$ , inset scale bars 250 nm.

## SEM analysis of the 5 mM CuCl<sub>2</sub>, 50 mM NaCl system

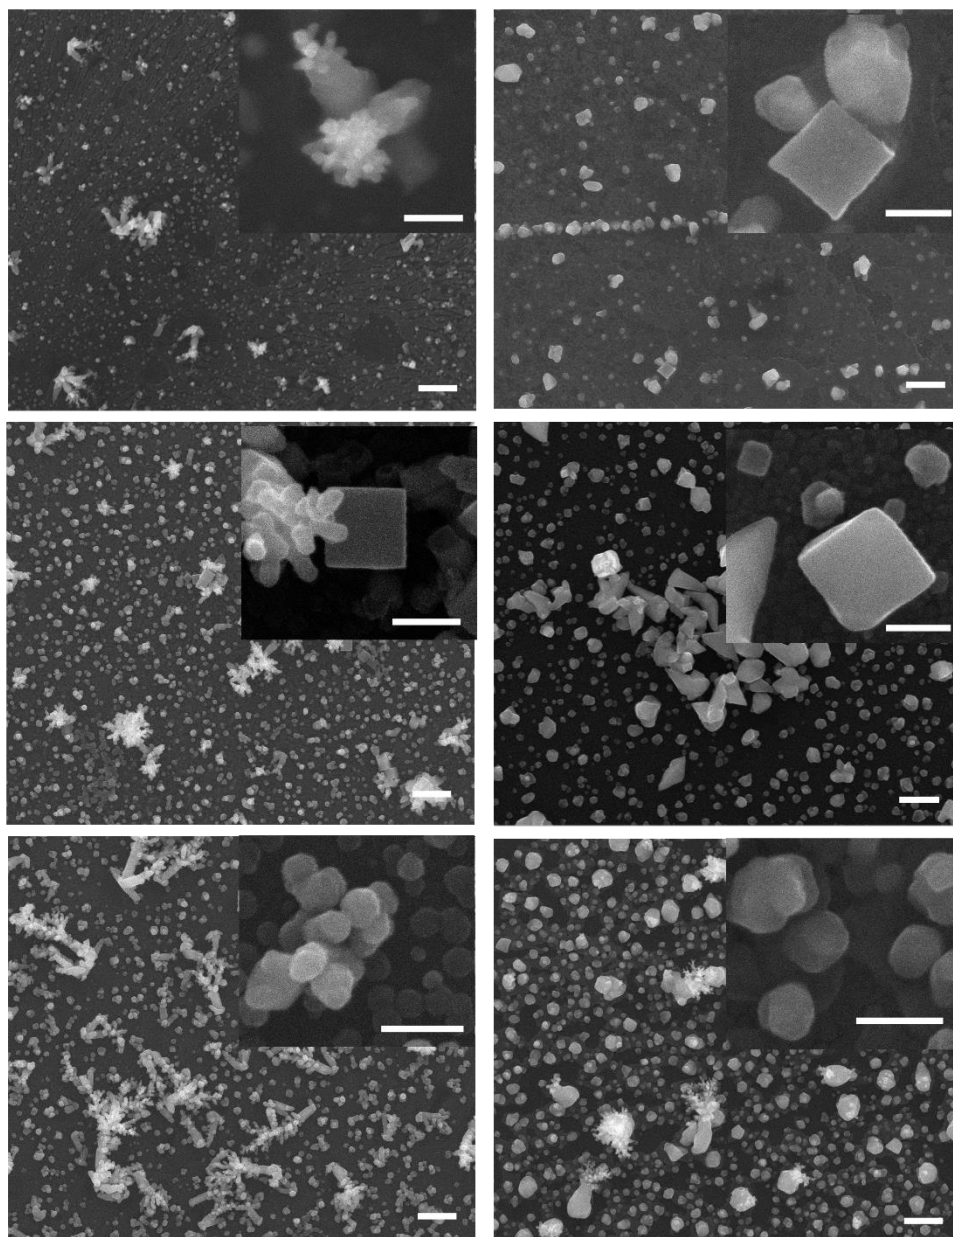

**Figure S8.** Figure showing representative secondary electron SEM images of electrodeposited copper electrodes from the 5 mM CuCl<sub>2</sub> and 50 mM NaCl solution with (a, b) 10 cycles, (c, d) 30 cycles and (e, f) 50 cycles where (a, c, e)  $t_R > t_O$  and (b, d, f)  $t_O > t_R$ . All scale bars of the images represent 1  $\mu\text{m}$ , insets 250 nm.

**Mimicking the high resistance environment with the high concentration system**

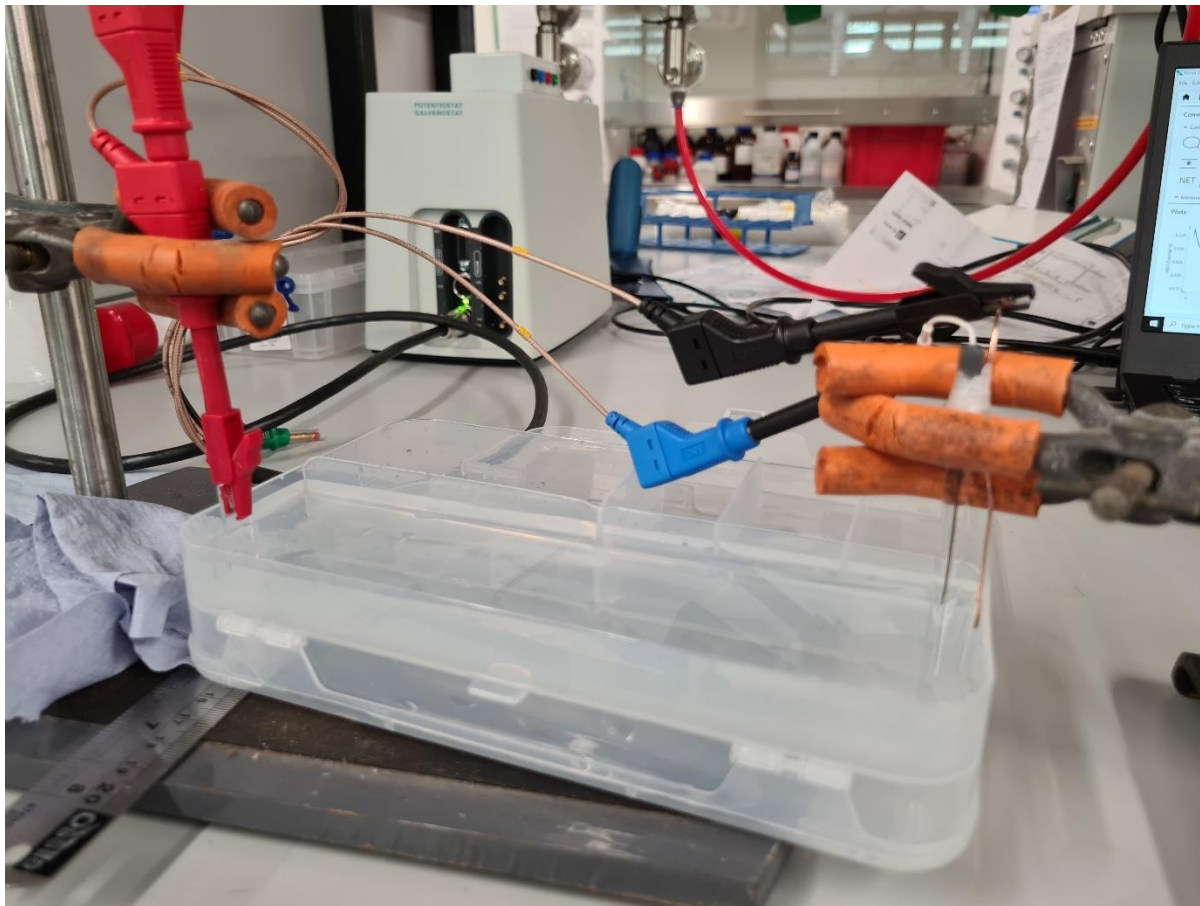

**Figure S9.** Photograph of the setup where increasing inter-electrode separation was measured.

## Electrochemistry of increasing inter-electrode separation

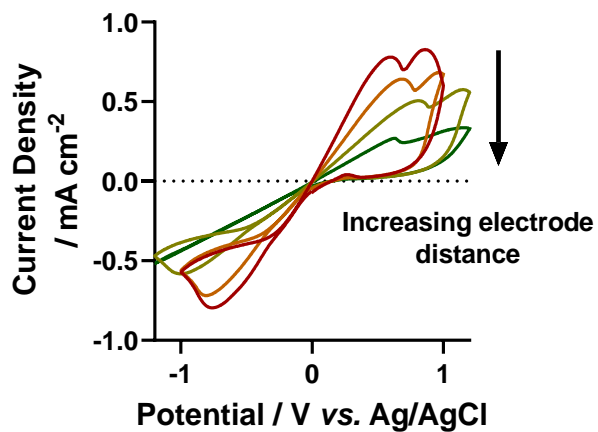

**Figure S10.** Cyclic voltammograms (CVs) of 5 mM CuCl<sub>2</sub> in the presence of 50 mM when increasing inter-electrode separation between the ITO-coated glass substrate working electrode, and the copper wire counter electrode and Ag/AgCl (3 M NaCl) reference electrode. Here red is 2 cm, brown is 5 cm, light green is 10 cm and dark green is 20 cm. CVs were recorded with a scan rate of 50 mV s<sup>-1</sup>.

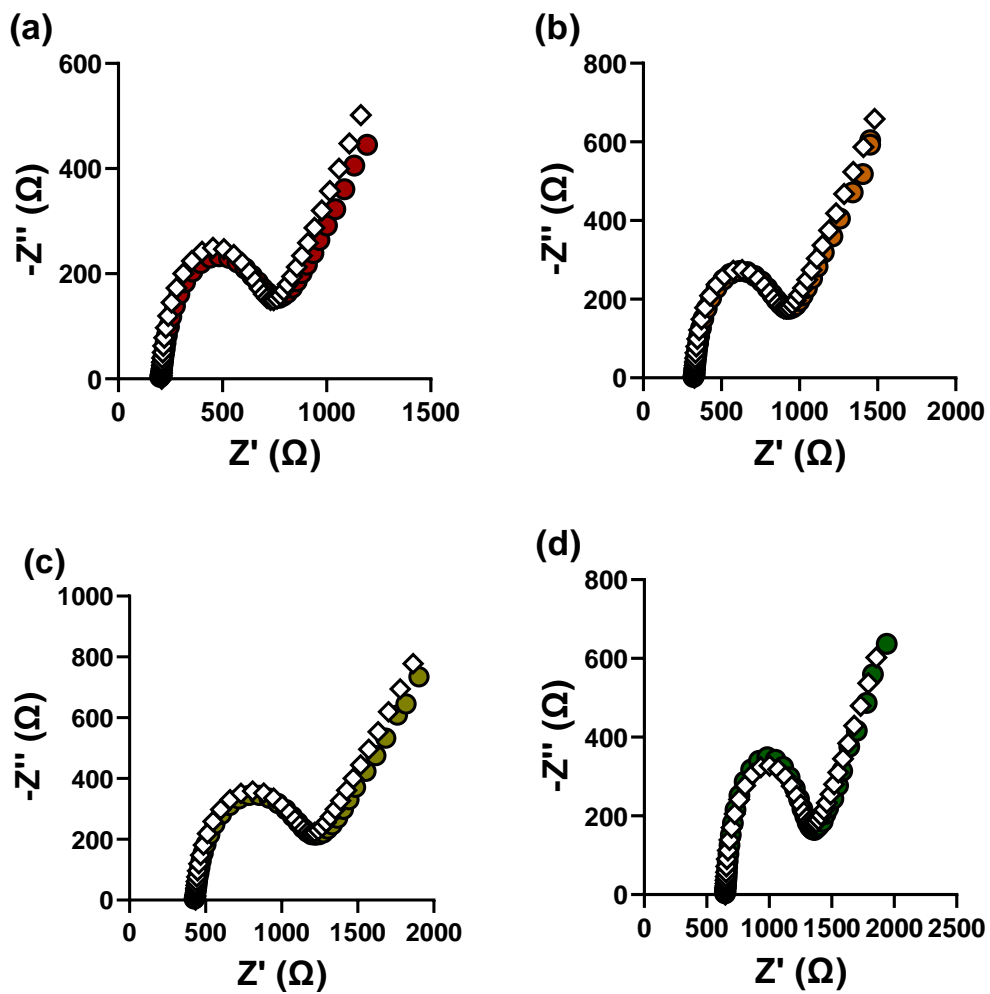

**Figure S11.** Electrochemical Impedance Spectra fitting for 5 mM  $\text{CuCl}_2$  in the presence of 50 mM NaCl with increasing inter-electrode distance for (a) 2 cm, (b) 5 cm, (c) 10 cm and (d) 20 cm. Using ITO-coated glass substrate working electrode, a Cu wire counter, and a Ag/AgCl (3 M NaCl) reference electrode.

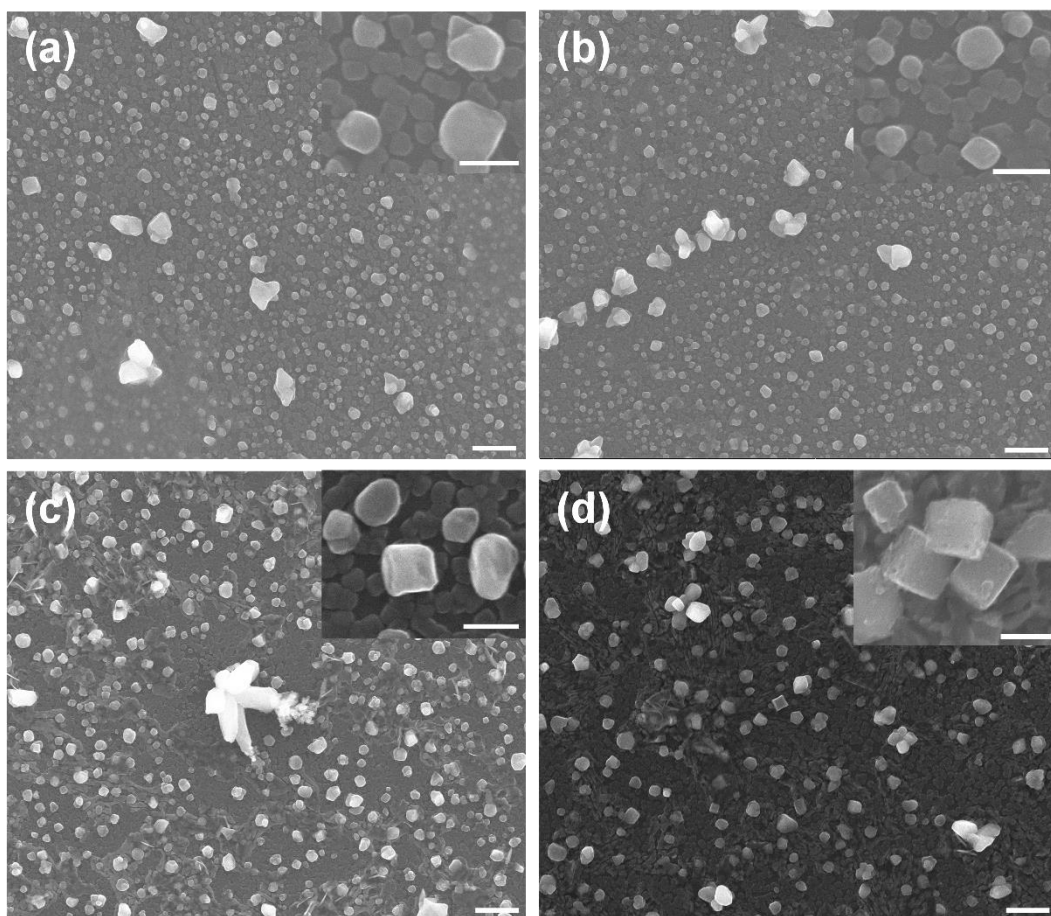

**Figure S12.** Representative SEM images of the 5 mM  $\text{CuCl}_2$ , 50 mM  $\text{NaCl}$  system with increasing inter-electrode separation between the working and counter and reference electrodes of (a) 2 cm, (b) 5 cm, (c) 10 cm and (d) 20 cm.



## EIS fitting for the mixed anion systems

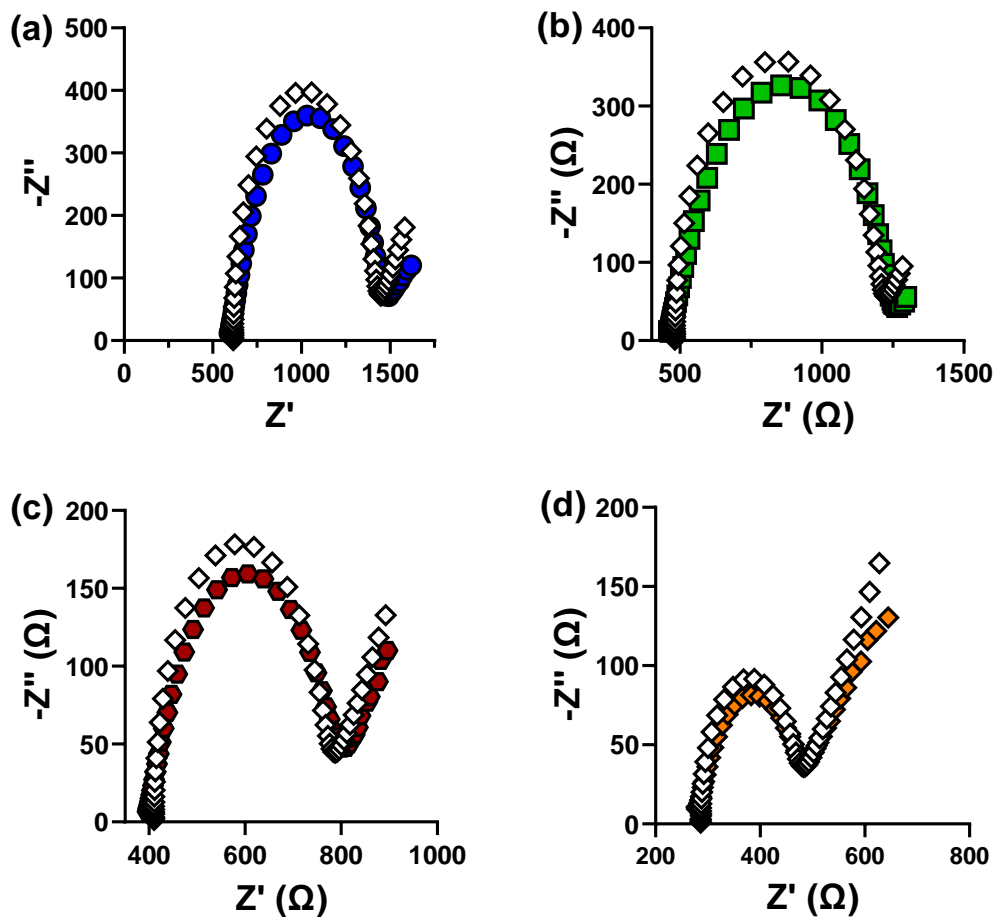

**Figure S13.** Electrochemical Impedance Spectra fitting for (a) 5 mM  $\text{CuCl}_2$  (b) 5 mM  $\text{Cu}(\text{CH}_3\text{CO}_2)_2$ , (c) 5 mM  $\text{Cu}(\text{NO}_3)_2$  and (d)  $\text{Cu}(\text{SO}_4)$ , in the presence of 5 mM  $\text{NaCl}$  (and 5 mM  $\text{Na}_2\text{SO}_4$  in the  $\text{CuSO}_4$  case). Using ITO-coated glass substrate working electrode, a Cu wire counter, and a  $\text{Ag}/\text{AgCl}$  (3 M  $\text{NaCl}$ ) reference electrode.

## Raman of mixed anion environment

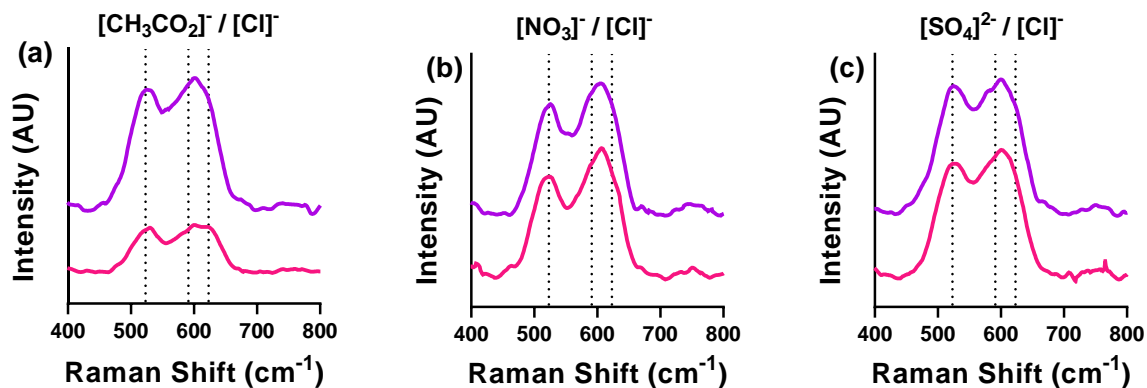

**Figure S14.** Raman spectra measured for (a) 5 mM Cu(Cl)<sub>2</sub> with 5 mM NaCl, (b) 5 mM Cu(CH<sub>3</sub>CO<sub>2</sub>)<sub>2</sub> with 5 mM NaCl, (c) 5 mM Cu(NO<sub>3</sub>)<sub>2</sub> with 5 mM NaCl and (d) 5 mM Cu(SO<sub>4</sub>) with 5 mM NaCl and 5 mM Na<sub>2</sub>SO<sub>4</sub>. These films were deposited using either t<sub>R</sub> 10 s and t<sub>O</sub> 5 s (purple) or t<sub>O</sub> 10 s and t<sub>R</sub> 5 s (pink) for 30 cycles. Recorded using a 633 nm wavelength laser at 50 x magnification and 25 % power (note the y-axis has been manually offset and is not representative of recorded intensity). Ticked lines are 525 and 625 which have been previously reported for Cu<sub>2</sub>O.<sup>1</sup>

## X-ray photoelectron spectroscopy of mixed anion environments

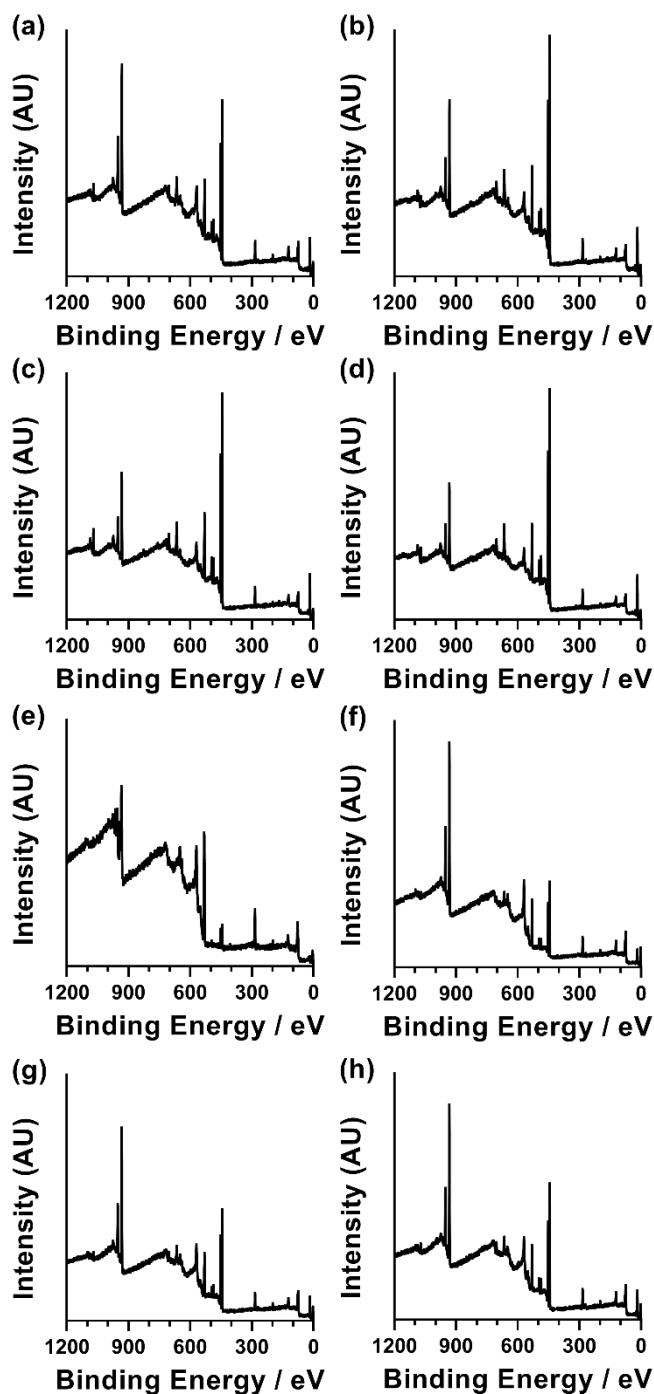

**Figure 15.** Figure showing the XPS survey spectra for thin film copper nanomaterial deposited using (a, b)  $\text{CuCl}_2$ , (c, d)  $\text{Cu}(\text{CH}_3\text{CO}_2)_2$ , (e, f)  $\text{Cu}(\text{NO}_3)_2$  and (g, h)  $\text{CuSO}_4$  salts, all in the presence of 5 mM NaCl. These depositions were through a 30-cycle step where (a, c, e, g) are  $t_R = 10$  s and  $t_O = 5$  s and (b, d, f, h) are  $t_R = 5$  s and  $t_O = 10$  s.

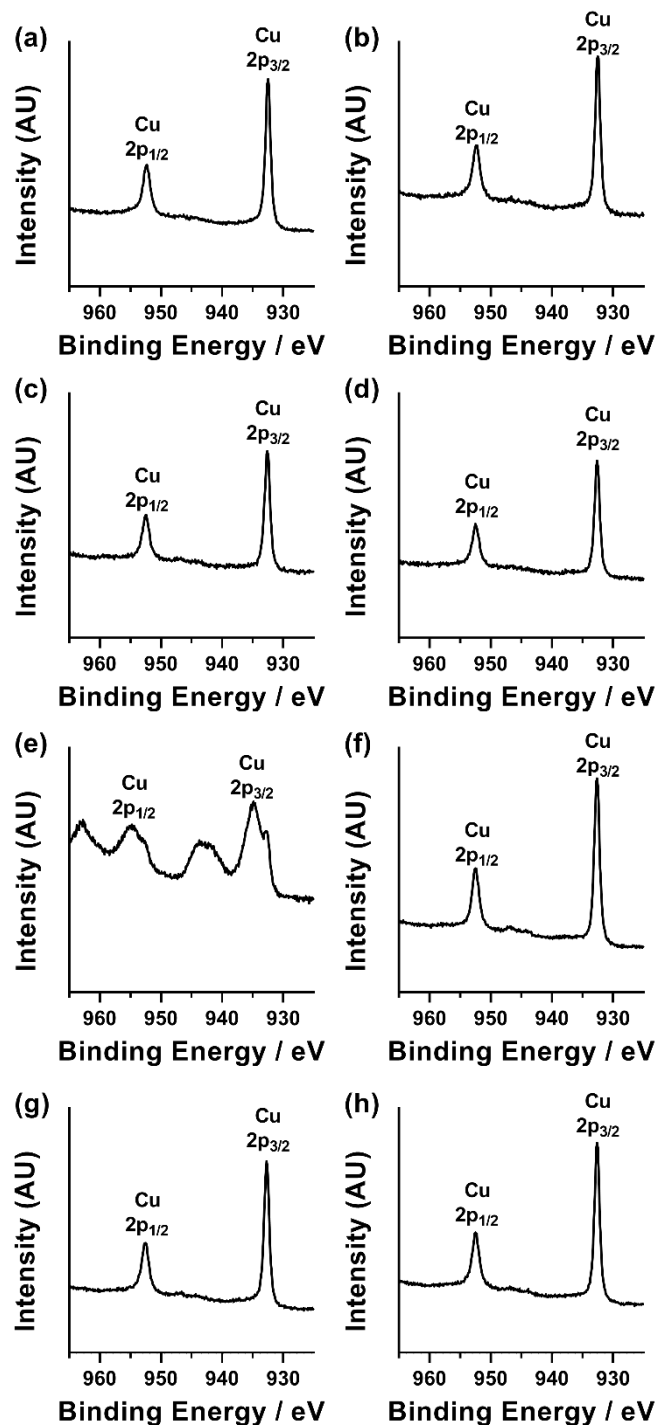

**Figure 16.** Figure showing the XPS Cu 2p spectra for thin film copper nanomaterial deposited using (a, b)  $\text{CuCl}_2$ , (c, d)  $\text{Cu}(\text{CH}_3\text{CO}_2)_2$ , (e, f)  $\text{Cu}(\text{NO}_3)_2$  and (g, h)  $\text{CuSO}_4$  salts, all in the presence of 5 mM NaCl. These depositions were through a 30-cycle step where (a, c, e, g) are  $t_R = 10$  s and  $t_O = 5$  s and (b, d, f, h) are  $t_R = 5$  s and  $t_O = 10$  s.

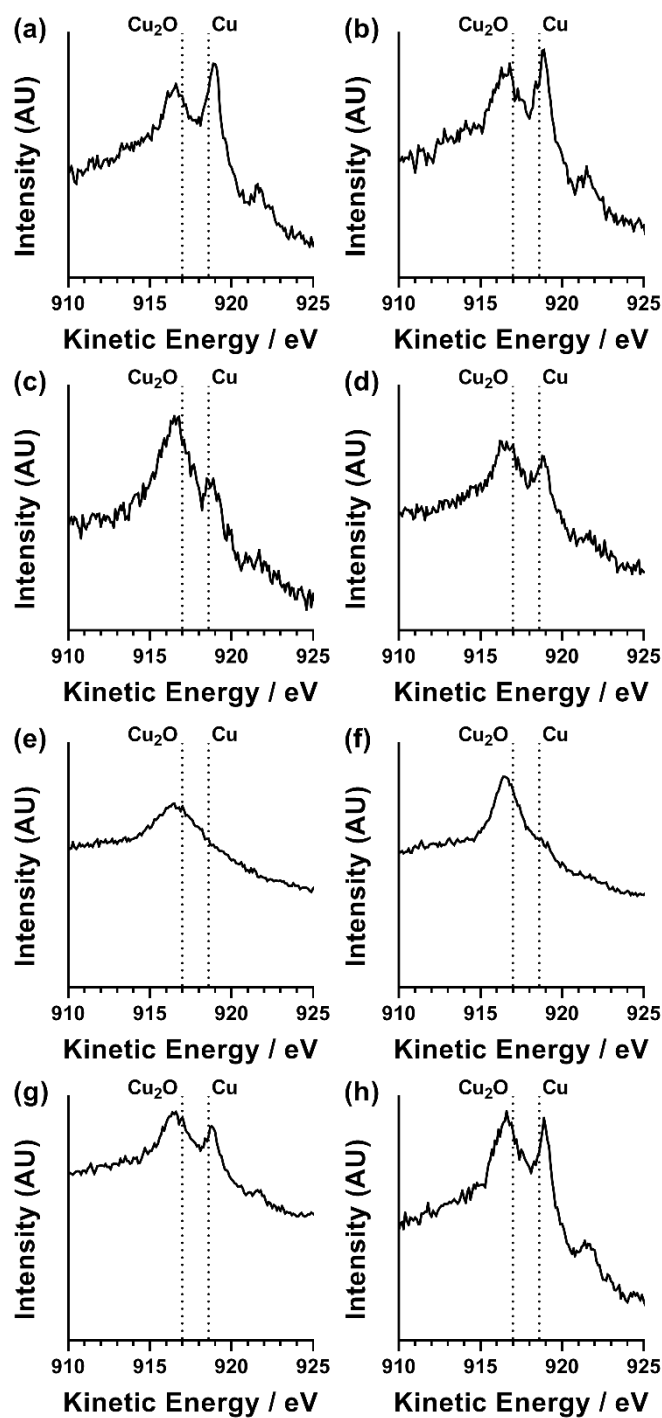

**Figure 17.** Figure showing the LMM Auger spectra for thin film copper nanomaterial deposited using (a, b)  $\text{CuCl}_2$ , (c, d)  $\text{Cu}(\text{CH}_3\text{CO}_2)_2$ , (e, f)  $\text{Cu}(\text{NO}_3)_2$  and (g, h)  $\text{CuSO}_4$  salts, all in the presence of 5 mM NaCl. These depositions were through a 30-cycle step where (a, c, e, g) are  $t_R = 10$  s and  $t_O = 5$  s and (b, d, f, h) are  $t_R = 5$  s and  $t_O = 10$  s.

## EIS Fitting for mono-anionic environment electrochemical analysis

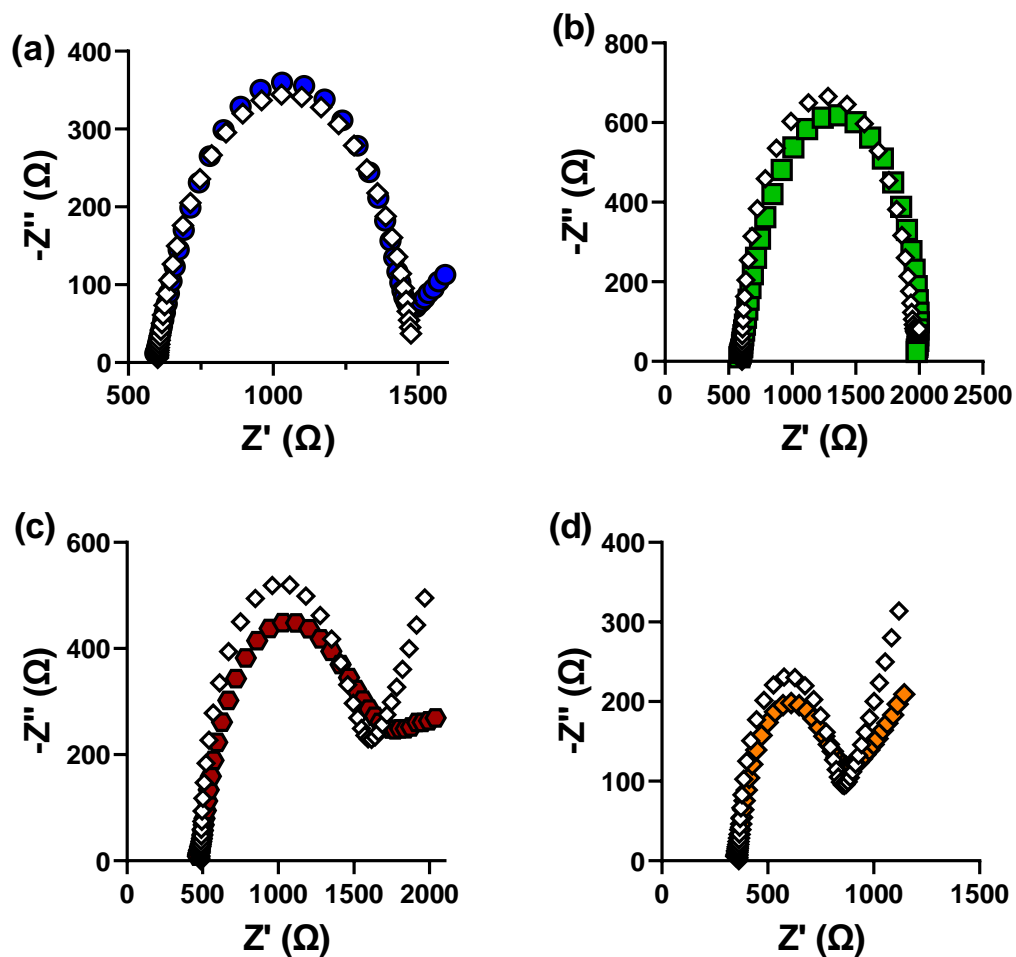

**Figure S18.** Electrochemical impedance spectroscopy (EIS) of 5 mM of various Cu salts (a) blue  $\text{Cu}(\text{Cl})_2$ , (b)  $\text{Cu}(\text{CH}_3\text{CO}_2)_2$ , (c)  $\text{Cu}(\text{NO}_3)_2$  and (d)  $\text{CuSO}_4$  in the presence of 5 mM Na[A] where [A] represents the anion of the corresponding copper salt.

## Raman analysis of mono-anionic environment depositions

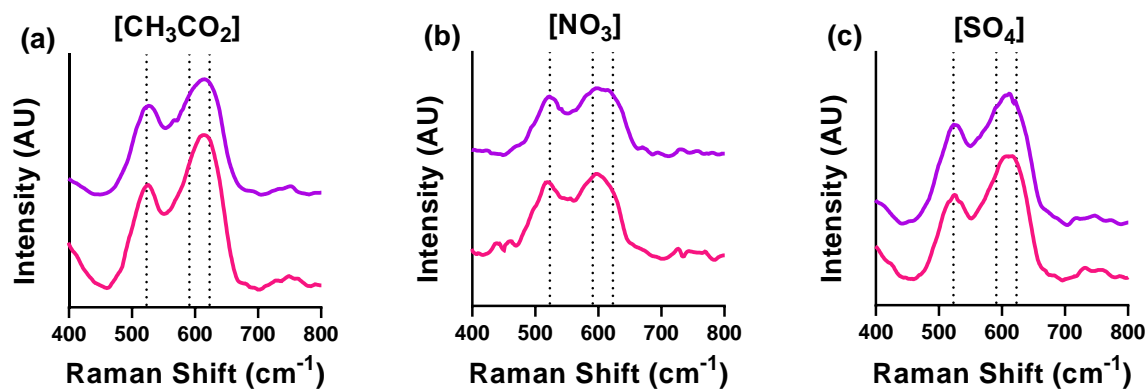

**Figure S19.** Raman spectra measured for 5 mM Cu[A] with 5 mM Na[A] mono anionic environments where (a) [A] = [CH<sub>3</sub>CO<sub>2</sub>], (b) 5 mM Cu(CH<sub>3</sub>CO<sub>2</sub>)<sub>2</sub> with 5 mM NaCl, (c) 5 mM Cu(NO<sub>3</sub>)<sub>2</sub> with 5 mM NaCl and (d) 5 mM Cu(SO<sub>4</sub>) with 5 mM NaCl and 5 mM Na<sub>2</sub>SO<sub>4</sub>. These films were deposited using either  $t_R$  10 s and  $t_O$  5 s (purple) or  $t_O$  10 s and  $t_R$  5 s (pink) for 30 cycles. Recorded using a 633 nm wavelength laser at 50 x magnification and 25 % power (note the y-axis has been manually offset and is not representative of recorded intensity). Ticked lines are 525 and 625 which have been previously reported for Cu<sub>2</sub>O.<sup>1</sup>

## X-ray Photoelectron Spectroscopy of mono-anionic environment depositions

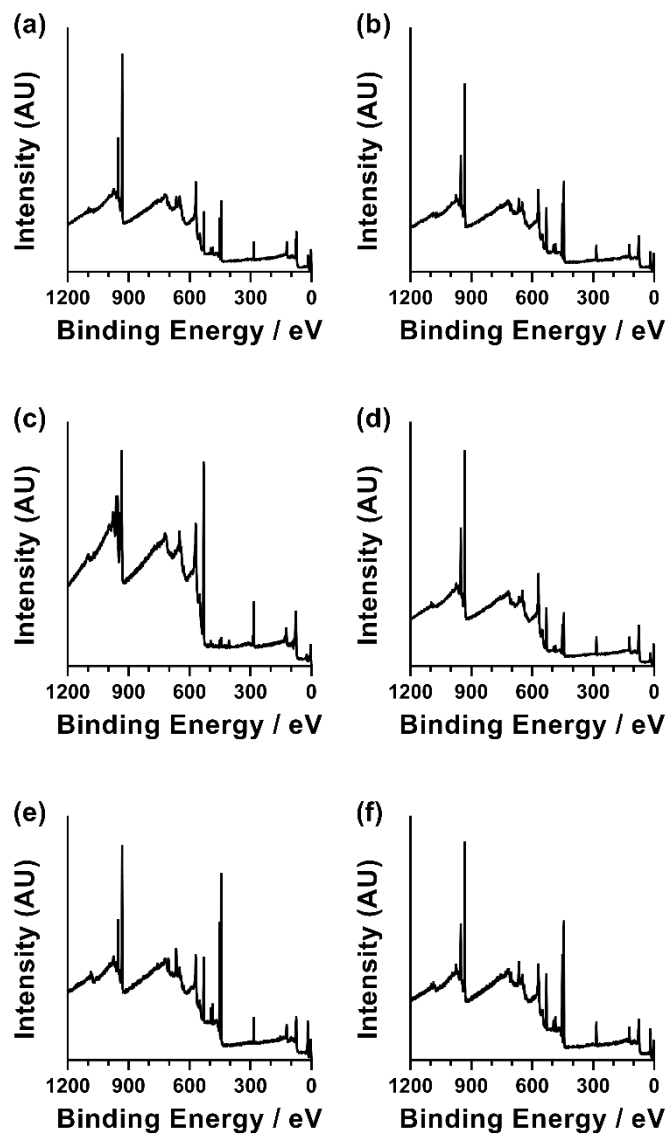

**Figure S20.** Figure showing the XPS survey spectra for thin film copper nanomaterial deposited using (a, b)  $\text{Cu}(\text{CH}_3\text{CO}_2)_2 + \text{NaCH}_3\text{CO}_2$ , (c, d),  $\text{Cu}(\text{NO}_3)_2 + \text{NaNO}_3$  and (e, f)  $\text{CuSO}_4 + \text{Na}_2\text{SO}_4$ . These depositions were through a 30-cycle step where (a, c, e) are  $t_R = 10$  s and  $t_O = 5$  s and (b, d, f) are  $t_R = 5$  s and  $t_O = 10$  s.



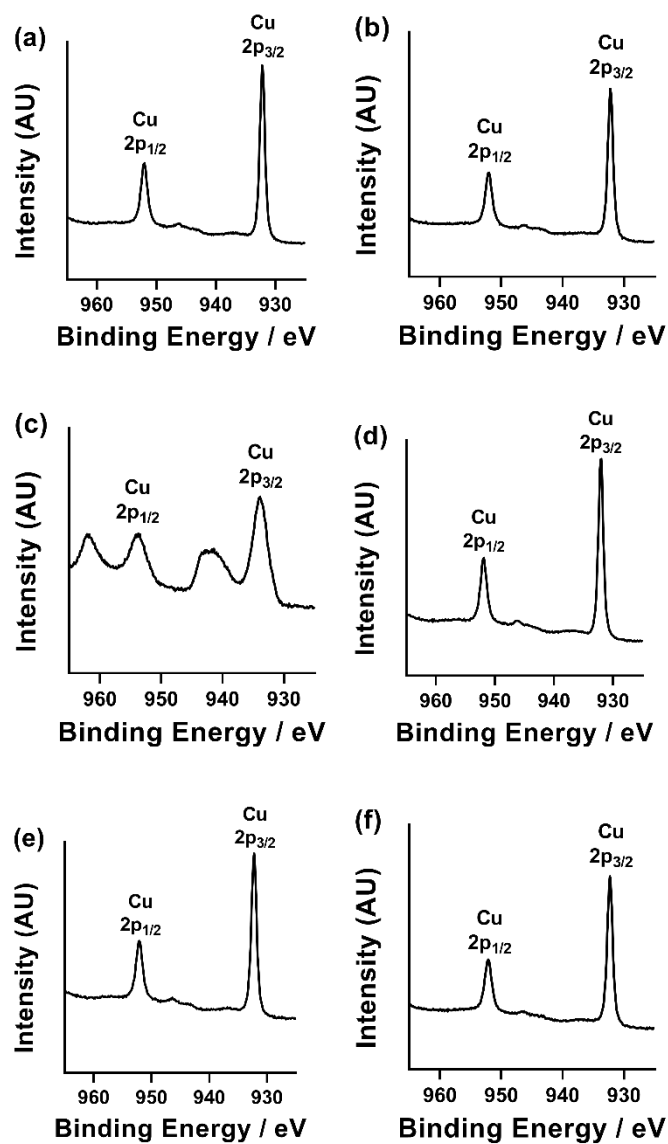

**Figure S21.** Figure showing the XPS Cu 2p spectra for thin film copper nanomaterial deposited using (a, b)  $\text{Cu}(\text{CH}_3\text{CO}_2)_2 + \text{NaCH}_3\text{CO}_2$ , (c, d),  $\text{Cu}(\text{NO}_3)_2 + \text{NaNO}_3$  and (e, f)  $\text{CuSO}_4 + \text{Na}_2\text{SO}_4$ . These depositions were through a 30-cycle step where (a, c, e) are  $t_R = 10$  s and  $t_O = 5$  s and (b, d, f) are  $t_R = 5$  s and  $t_O = 10$  s.

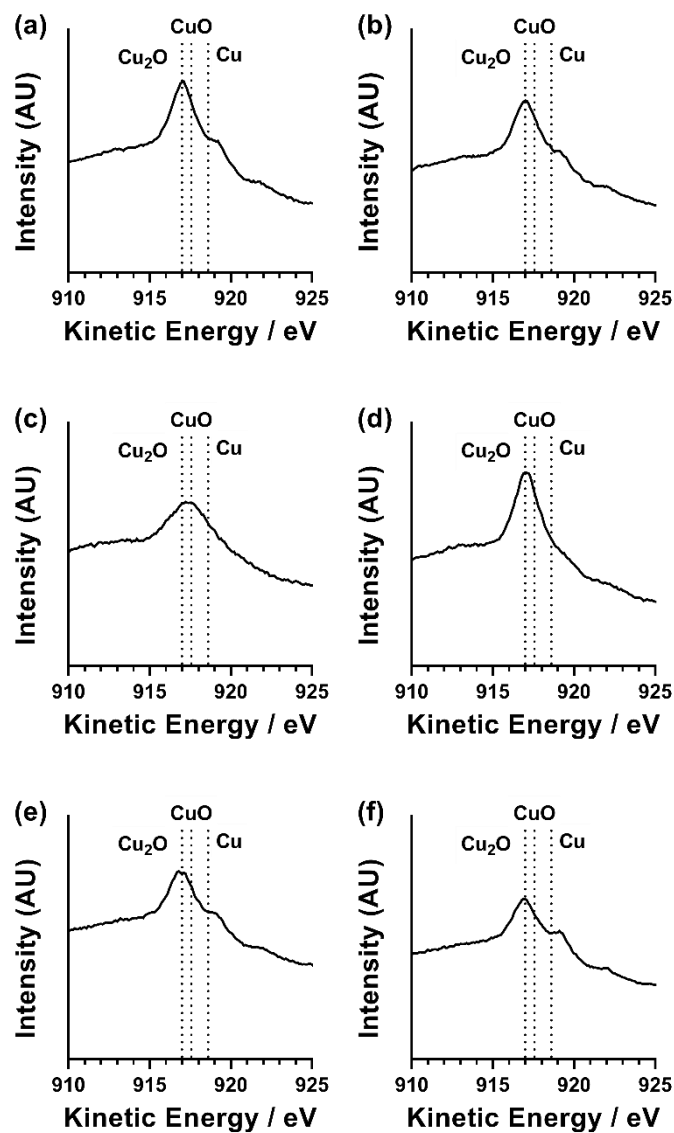

**Figure S22.** Figure showing the LMM Auger spectra for thin film copper nanomaterial deposited using (a, b)  $\text{Cu}(\text{CH}_3\text{CO}_2)_2 + \text{NaCH}_3\text{CO}_2$ , (c, d),  $\text{Cu}(\text{NO}_3)_2 + \text{NaNO}_3$  and (e, f)  $\text{CuSO}_4 + \text{Na}_2\text{SO}_4$ . These depositions were through a 30-cycle step where (a, c, e) are  $t_R = 10$  s and  $t_O = 5$  s and (b, d, f) are  $t_R = 5$  s and  $t_O = 10$  s.

## UV-Vis spectra

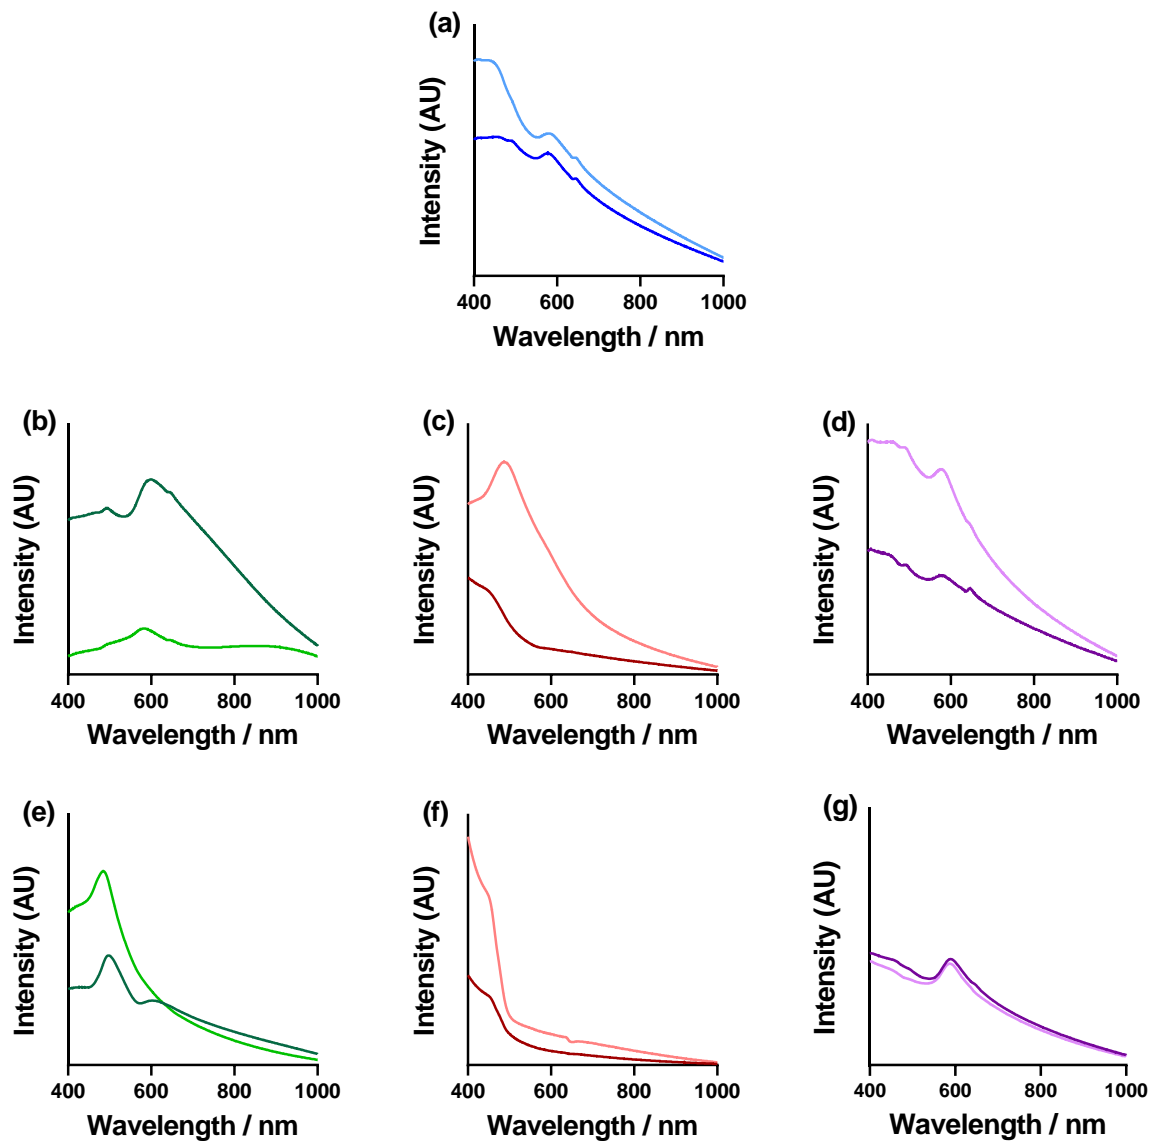

**Figure S23.** Figure showing measured UV-Vis spectra for thin films deposited through (dark)  $t_R > t_0$  and (light)  $t_0 > t_0$  for (a)  $\text{CuCl}_2 + \text{NaCl}$ , (b)  $\text{Cu}(\text{CH}_3\text{CO}_2) + \text{NaCl}$ , (c)  $\text{Cu}(\text{NO}_3) + \text{NaCl}$ , (d)  $\text{CuSO}_4 + \text{NaCl} + \text{Na}_2\text{SO}_4$ , (e)  $\text{Cu}(\text{CH}_3\text{CO}_2) + \text{NaCH}_3\text{CO}_2$ , (f)  $\text{Cu}(\text{NO}_3) + \text{NaNO}_3$  and (g)  $\text{CuSO}_4 + \text{Na}_2\text{SO}_4$ .

## Band gap Tauc analysis

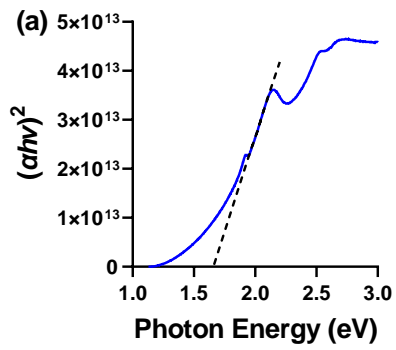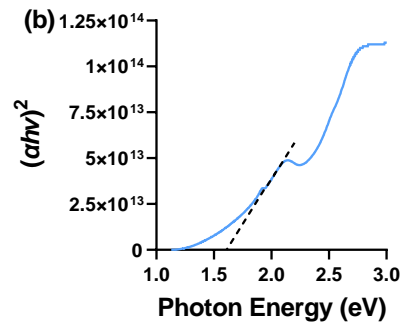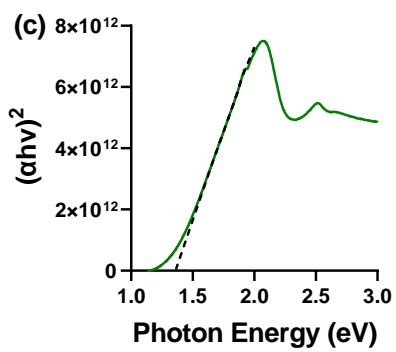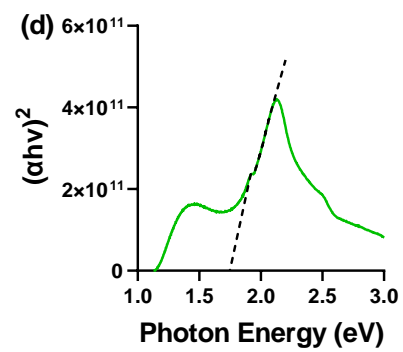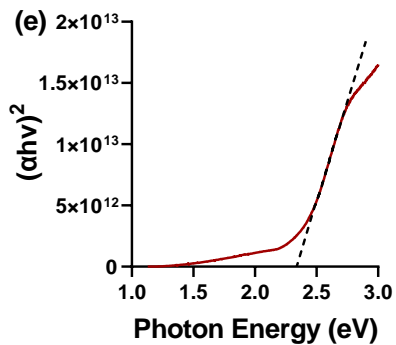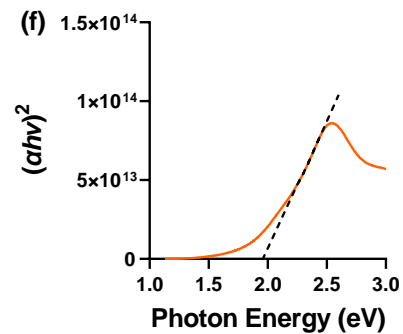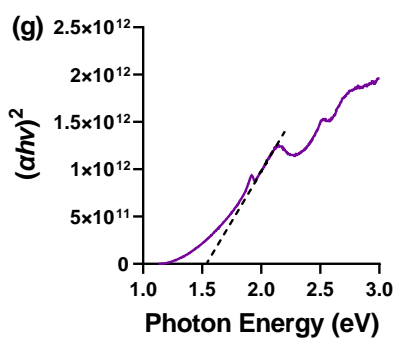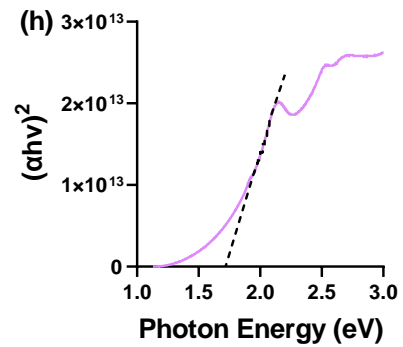

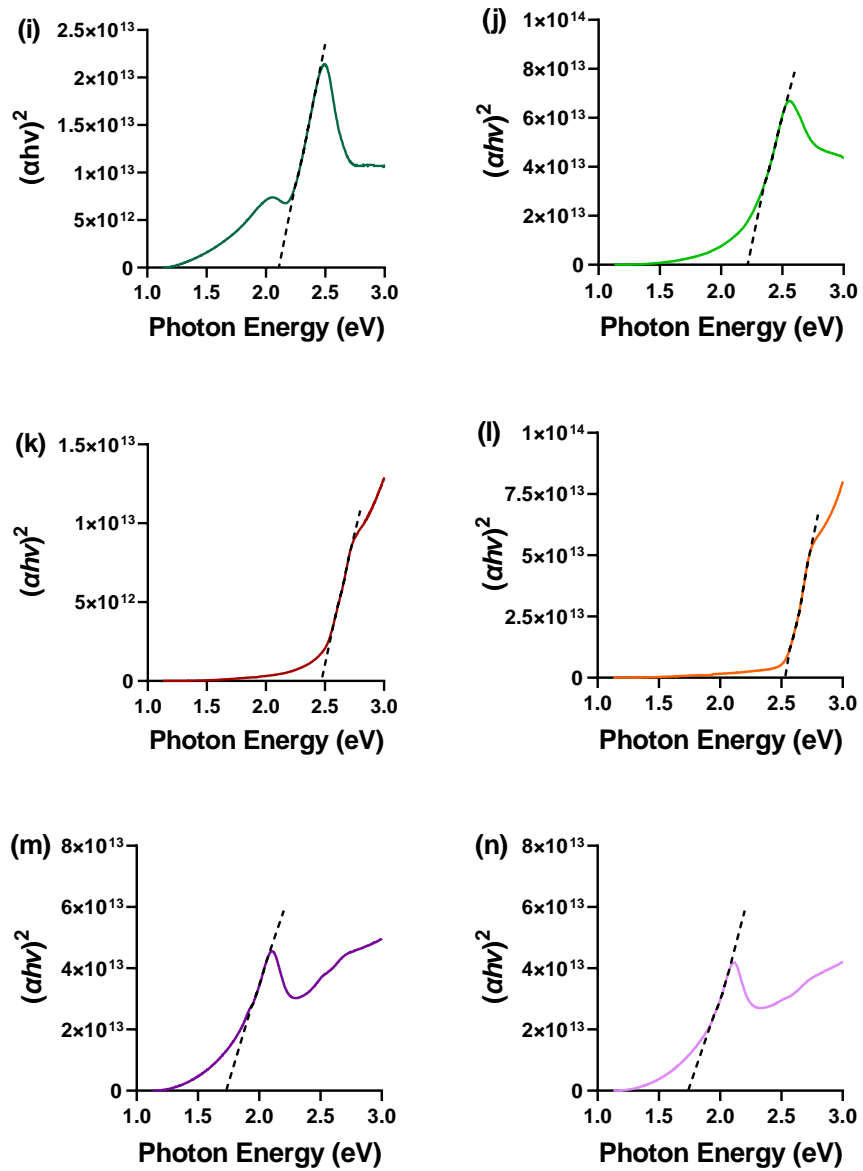

**Figure S24.** Tauc plots of all investigated systems where (a), (b), (c), (d), (e), (f), (g), (h), (i), (j), (k), (l), (m), (n).

## Tables of data for all investigated systems

**Table S3.** Table of data for Ionic Strength, pH, Conductivity,  $V_{OCP}$ ,  $R_S$ ,  $R_{ET}$ ,  $j_p$ , thin film resistance, thin film conductivity and thin film  $E_g$

| System                                                                                         | Ionic Strength* / mM | pH   | Conductivity / mS cm <sup>-1</sup> | $V_{OCP}$ / mV vs Ag/AgCl | $R_S$ / $\Omega$ cm <sup>-2</sup> | $R_{ET}$ / $\Omega$ cm <sup>-2</sup> | $j_p$ / mA cm <sup>-2</sup> |                 | Resistance <sup>†</sup> / $\Omega$ |                 | Conductivity / S cm <sup>-1</sup> |                 | $E_g$ / eV      |                 |
|------------------------------------------------------------------------------------------------|----------------------|------|------------------------------------|---------------------------|-----------------------------------|--------------------------------------|-----------------------------|-----------------|------------------------------------|-----------------|-----------------------------------|-----------------|-----------------|-----------------|
|                                                                                                |                      |      |                                    |                           |                                   |                                      | ( $t_R > t_O$ )             | ( $t_O > t_R$ ) | ( $t_R > t_O$ )                    | ( $t_O > t_R$ ) | ( $t_R > t_O$ )                   | ( $t_O > t_R$ ) | ( $t_R > t_O$ ) | ( $t_O > t_R$ ) |
| CuCl <sub>2</sub><br>5 mM NaCl                                                                 | 25                   | 5.32 | 1.24                               | 213 ± 6                   | 614 ± 5                           | 790 ± 13                             | 1.03                        | 1.06            | 91 ± 2                             | 118 ± 18        | 813 ± 20                          | 630 ± 94        | 1.66            | 1.60            |
| CuCl <sub>2</sub><br>50 mM NaCl                                                                | 115                  | 5.41 | 5.16                               | 264 ± 3                   | 253 ± 2                           | 580 ± 9                              | 1.31                        | 1.25            | 156 ± 3                            | 111 ± 1         | 476 ± 9                           | 667 ± 4         | -               | -               |
| Cu(CH <sub>3</sub> CO <sub>2</sub> ) <sub>2</sub><br>5 mM CuCl <sub>2</sub>                    | 25                   | 5.85 | 1.07                               | 155 ± 3                   | 482 ± 4                           | 712 ± 13                             | 0.65                        | 0.64            | 142 ± 13                           | 140 ± 10        | 180 ± 16                          | 183 ± 13        | 1.36            | 1.74            |
| Cu(NO <sub>3</sub> ) <sub>2</sub><br>5 mM NaCl                                                 | 25                   | 5.57 | 1.71                               | 170 ± 9                   | 410 ± 3                           | 352 ± 6                              | 0.81                        | 0.84            | 127 ± 2                            | 114 ± 5         | 390 ± 06                          | 436 ± 18        | 2.34            | 1.96            |
| CuSO <sub>4</sub><br>5 mM NaCl<br>5 mM Na <sub>2</sub> SO <sub>4</sub>                         | 60                   | 5.53 | 2.06                               | 176 ± 3                   | 286 ± 2                           | 178 ± 2                              | 1.00                        | 0.94            | 151 ± 7                            | 115 ± 7         | 329 ± 30                          | 430 ± 26        | 1.54            | 1.72            |
| Cu(CH <sub>3</sub> CO <sub>2</sub> ) <sub>2</sub><br>5 mM<br>NaCH <sub>3</sub> CO <sub>2</sub> | 25                   | 6.01 | 0.38                               | 123 ± 6                   | 605 ± 5                           | 1325 ± 24                            | 0.53                        | 0.48            | 99 ± 11                            | 164 ± 3         | 257 ± 27                          | 156 ± 3         | 2.11            | 2.19            |
| Cu(NO <sub>3</sub> ) <sub>2</sub><br>5 mM NaNO <sub>3</sub>                                    | 25                   | 5.44 | 1.65                               | 129 ± 3                   | 488 ± 5                           | 1004 ± 27                            | 0.55                        | 0.62            | -                                  | 103 ± 1         | -                                 | 482 ± 6         | 2.47            | 2.53            |
| CuSO <sub>4</sub><br>10 mM<br>Na <sub>2</sub> SO <sub>4</sub>                                  | 80                   | 5.73 | 2.62                               | 119 ± 3                   | 363 ± 3                           | 446 ± 10                             | 0.95                        | 0.92            | 98 ± 1                             | 120 ± 2         | 505 ± 7                           | 412 ± 6         | 1.73            | 1.74            |
| * Assuming full ionic dissociation                                                             |                      |      |                                    |                           |                                   |                                      |                             |                 |                                    |                 |                                   |                 |                 |                 |
| † Note this is absolute resistance and not resistance density in $\Omega$ / sq.                |                      |      |                                    |                           |                                   |                                      |                             |                 |                                    |                 |                                   |                 |                 |                 |

**Table S4.** Table of data for quantitative Cu<sub>2</sub>O nanocube analysis

| System                                                                                      | Average size of ( $t_R > t_O$ ) nanocubes / nm | Average size of ( $t_O > t_R$ ) nanocubes / nm | Coverage of ( $t_R > t_O$ ) nanocubes / cm <sup>-2</sup> | Coverage of ( $t_O > t_R$ ) nanocubes / cm <sup>-2</sup> |
|---------------------------------------------------------------------------------------------|------------------------------------------------|------------------------------------------------|----------------------------------------------------------|----------------------------------------------------------|
| CuCl <sub>2</sub><br>5 mM NaCl*                                                             | 136 ± 21                                       | 134 ± 15                                       | 2.01 x10 <sup>8</sup> ± 5.56 x10 <sup>7</sup>            | 3.10 x10 <sup>8</sup> ± 1.83 x10 <sup>7</sup>            |
| CuCl <sub>2</sub><br>50 mM NaCl                                                             | /                                              | /                                              | /                                                        | /                                                        |
| Cu(CH <sub>3</sub> CO <sub>2</sub> ) <sub>2</sub> 5<br>mM CuCl <sub>2</sub>                 | 392 ± 55                                       | /                                              | 5.73 x10 <sup>7</sup> ± 2.92 x10 <sup>6</sup>            | /                                                        |
| Cu(NO <sub>3</sub> ) <sub>2</sub><br>5 mM NaCl                                              | /                                              | 202 ± 52                                       | /                                                        | 6.29 x10 <sup>8</sup> ± 4.53 x10 <sup>7</sup>            |
| CuSO <sub>4</sub><br>5 mM NaCl<br>5 mM Na <sub>2</sub> SO <sub>4</sub>                      | /                                              | /                                              | /                                                        | /                                                        |
| Cu(CH <sub>3</sub> CO <sub>2</sub> ) <sub>2</sub> 5<br>mM NaCH <sub>3</sub> CO <sub>2</sub> | /                                              | /                                              | /                                                        | /                                                        |
| Cu(NO <sub>3</sub> ) <sub>2</sub><br>5 mM NaNO <sub>3</sub>                                 | /                                              | 181 ± 2                                        | /                                                        | 1.13 x10 <sup>9</sup> ± 1.00 x10 <sup>8</sup>            |
| CuSO <sub>4</sub><br>10 mM Na <sub>2</sub> SO <sub>4</sub>                                  | /                                              | 104 ± 14                                       | /                                                        | 7.28 x10 <sup>8</sup> ± 7.29 x10 <sup>7</sup>            |
| - All Cu salts are 5 mM concentration                                                       |                                                |                                                |                                                          |                                                          |
| * The size and coverage were calculated from the 30-cycle deposition                        |                                                |                                                |                                                          |                                                          |
